# Supplementary material for: Comparative Mitogenomics in Hyalella (Amphipoda: Crustacea)
Source: MDPI journal article supplement (doi:10.3390/genes12020292), 2021-02-19
Supplement: s1 [file s1]

Ancestral pancrustacean

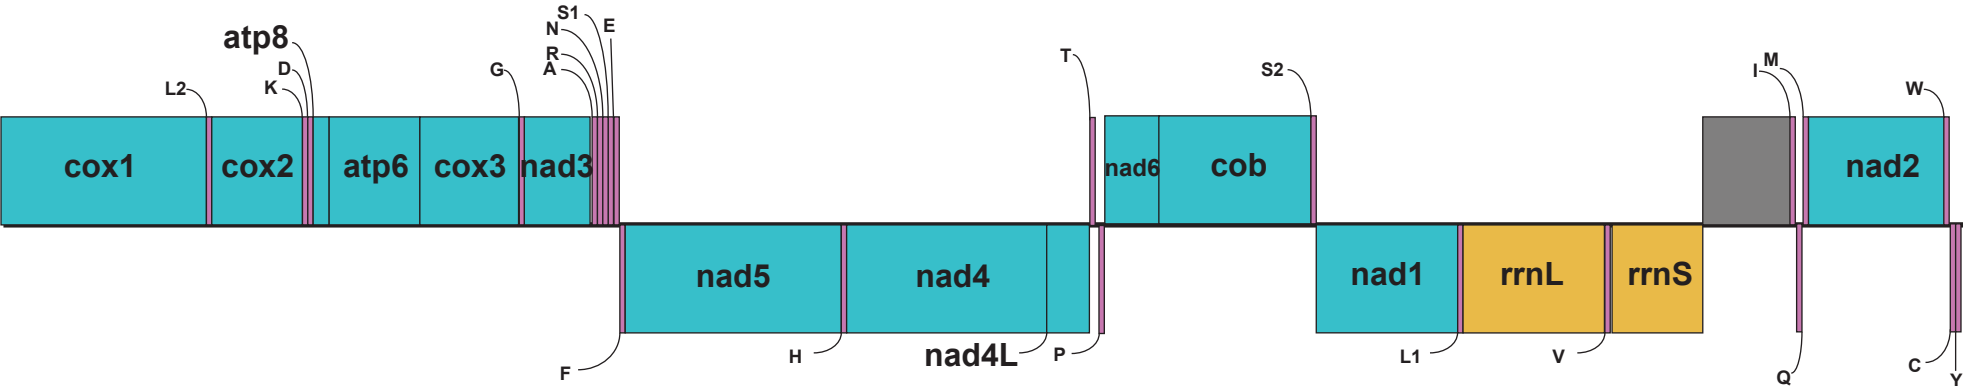

transposition 1

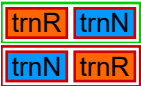

transposition 2

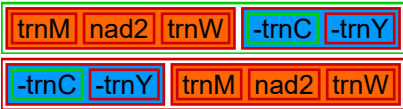

transposition 3

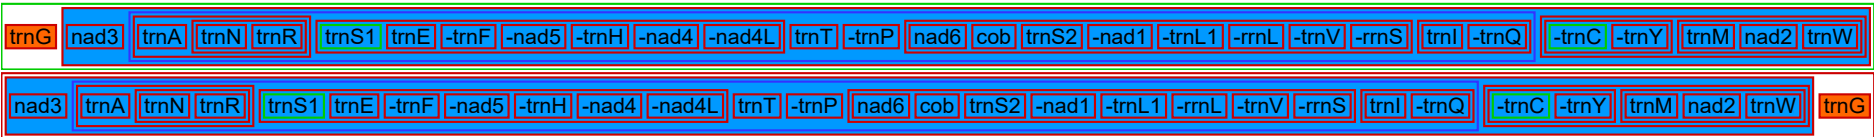

reversion 1

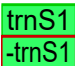

reversion 2

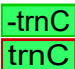

tldr

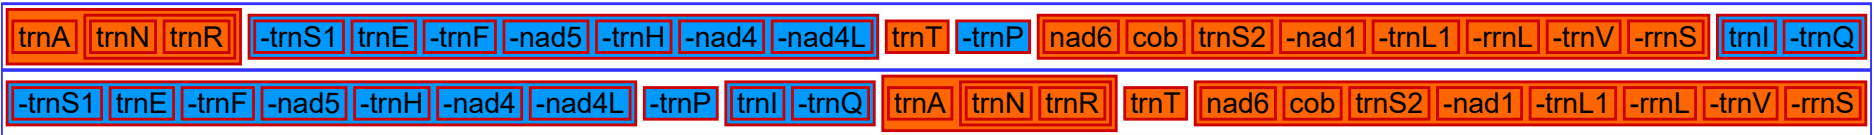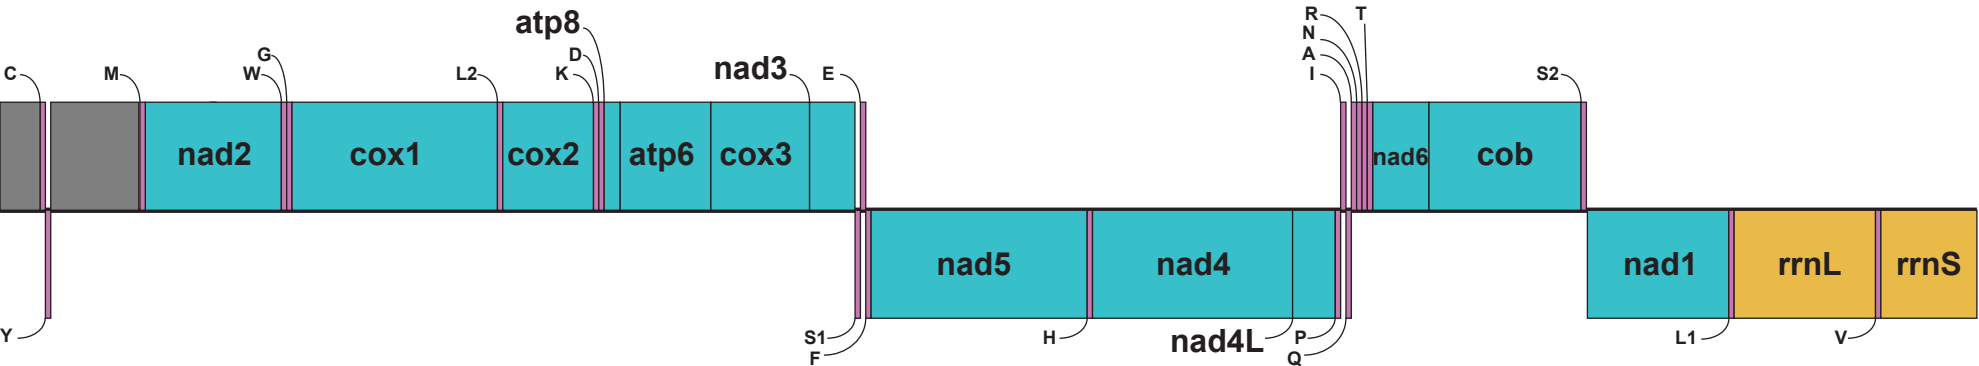

South-American *Hyalella* sp.
