# Supplementary figures and images for: Comparative Mitogenomics in Hyalella (Amphipoda: Crustacea)
Source: MDPI journal article supplement (doi:10.3390/genes12020292), 2021-02-19

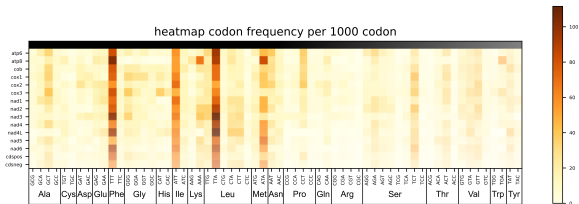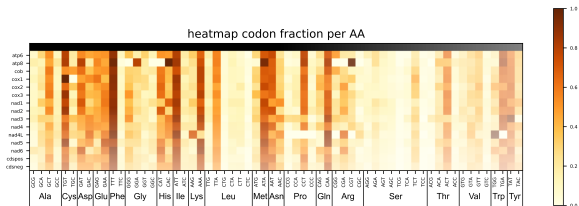

Supplement: s1 [file s1]

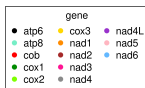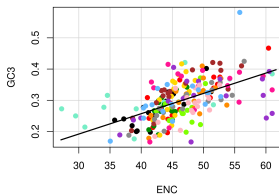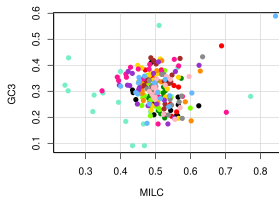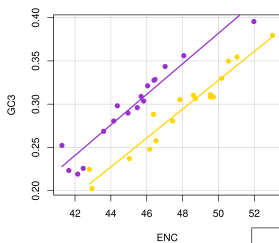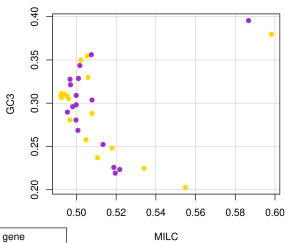

Supplement: s1 [file s1]

**Metacrangonyctidae**

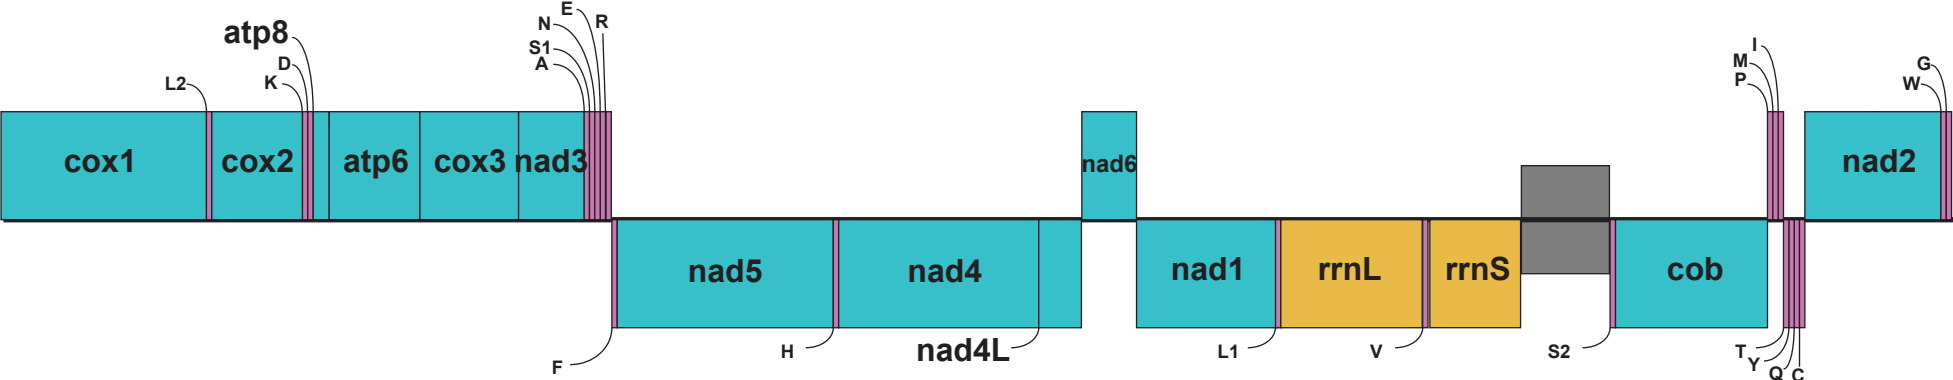

***Pseudoniphargus daviui***

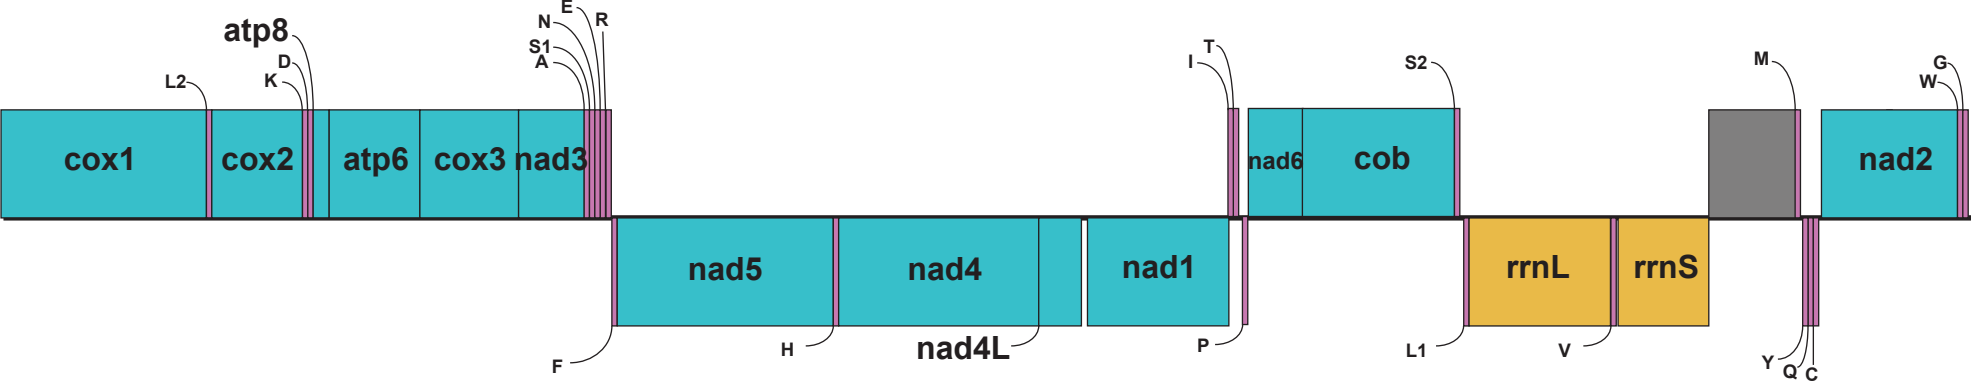

***Parhyale hawaiiensis***

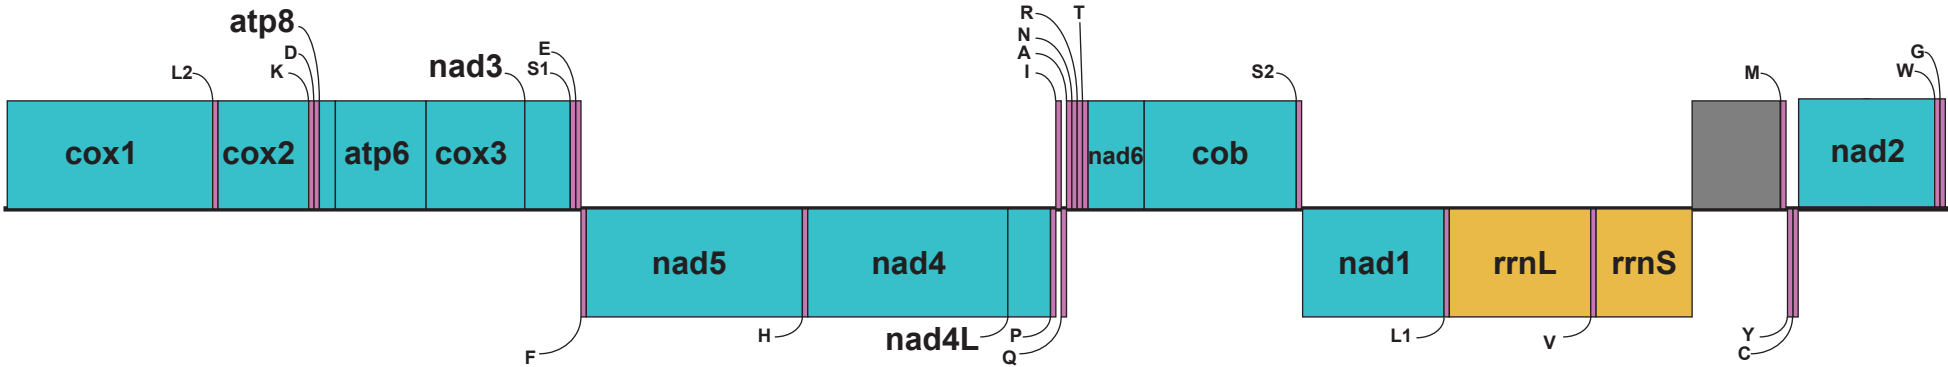

***Platorchestia* sp.**

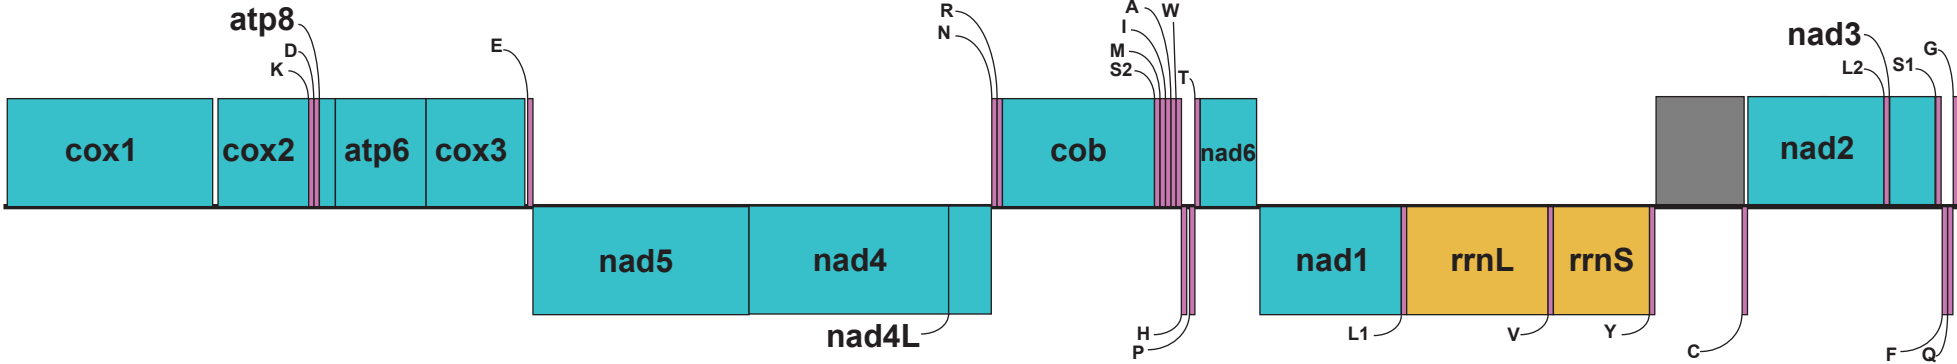

Supplement: s1 [file s1]
